# Supplementary figures and images for: Structure based investigation on the binding interaction of transport proteins in leishmaniasis: insights from molecular simulation
Source: Royal Society of Chemistry journal article supplement (doi:10.1039/c4mb00713a), 2015-03-03

### ACTIVATORS OF P4-ATPase

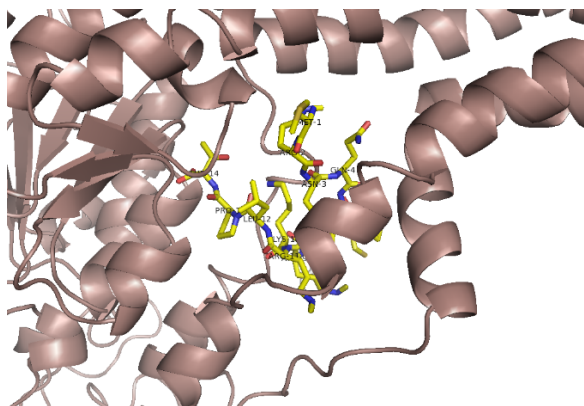

**A1**

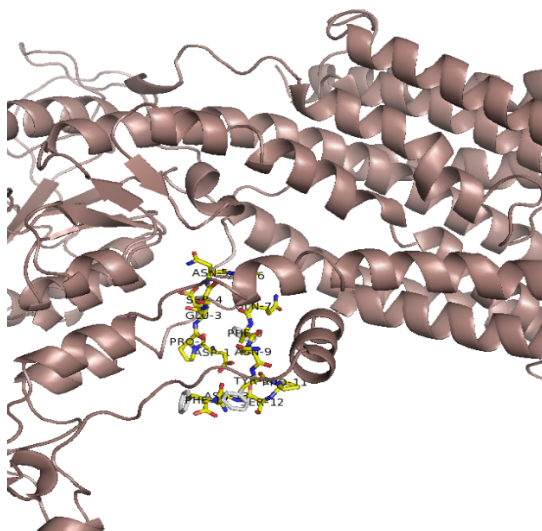

**A2**

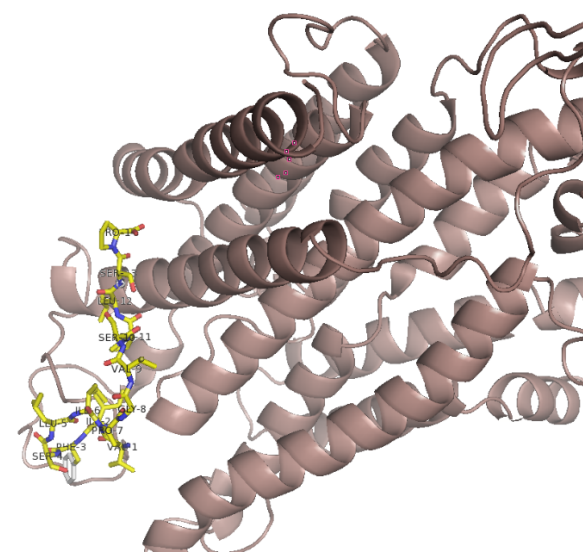

**A3**

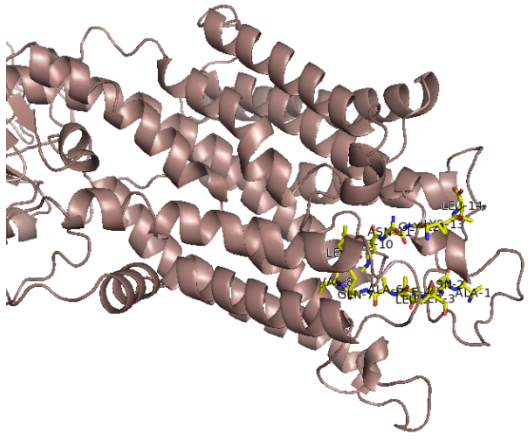

**A4**

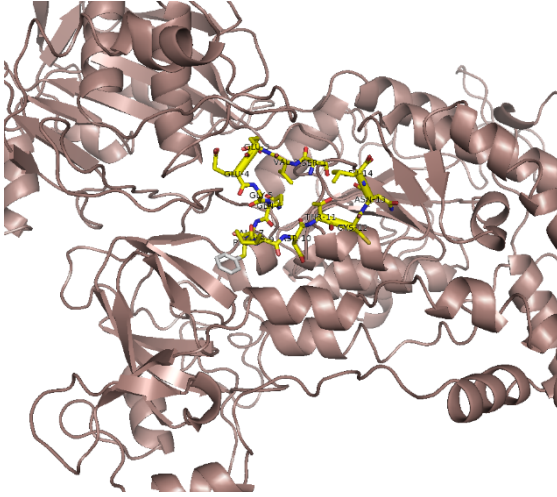

**A5**

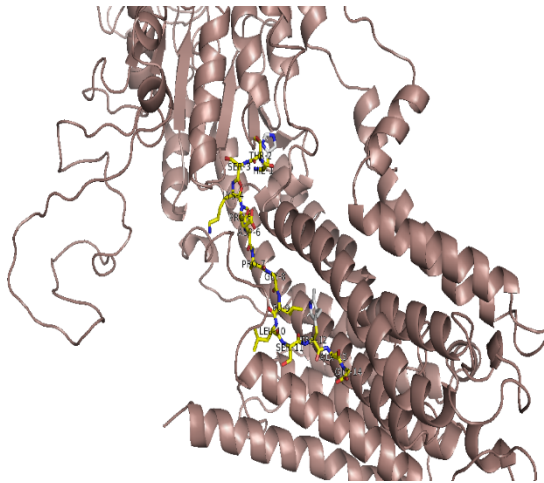

**A6**

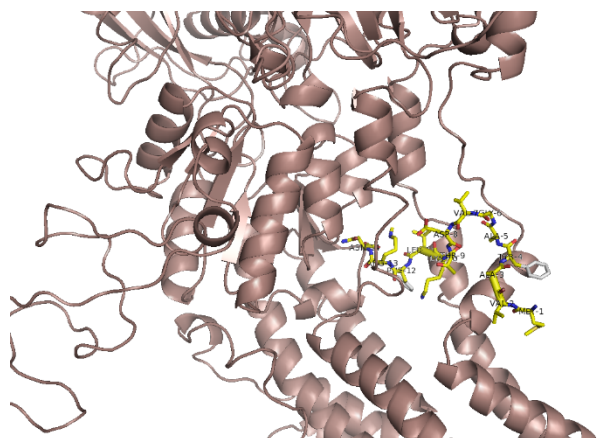

**A7**

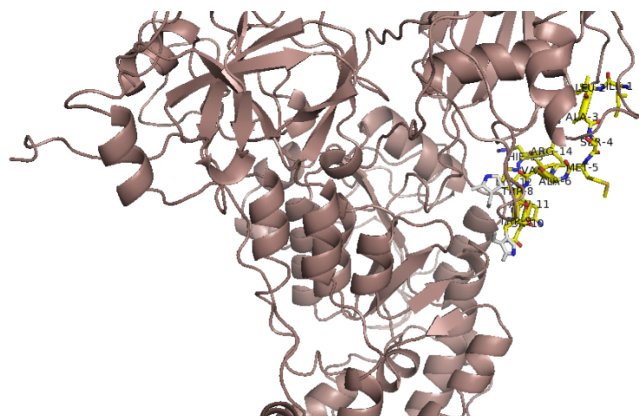

**A8**

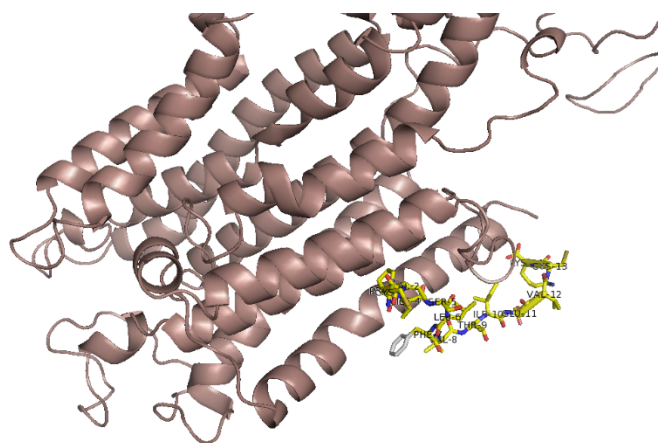

**A9**

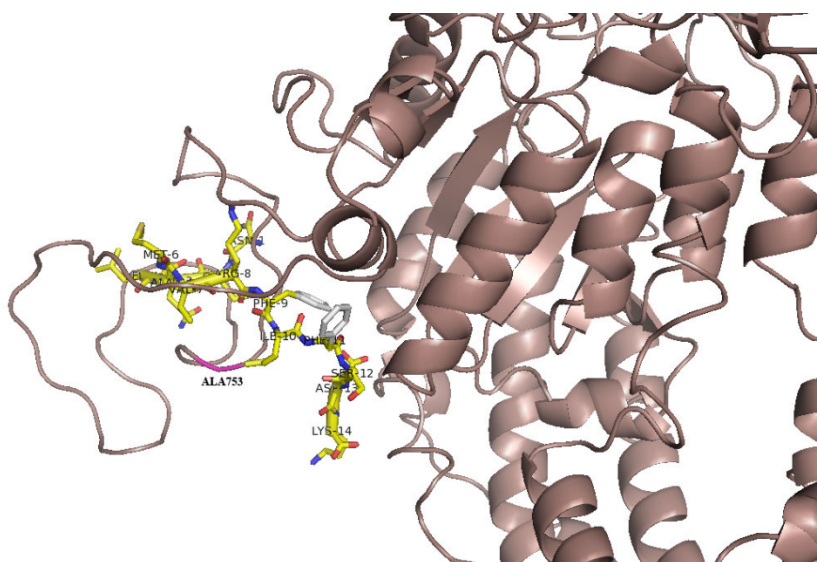

A10

**INHIBITORS OF PgP like ABC TRANSPORTER**

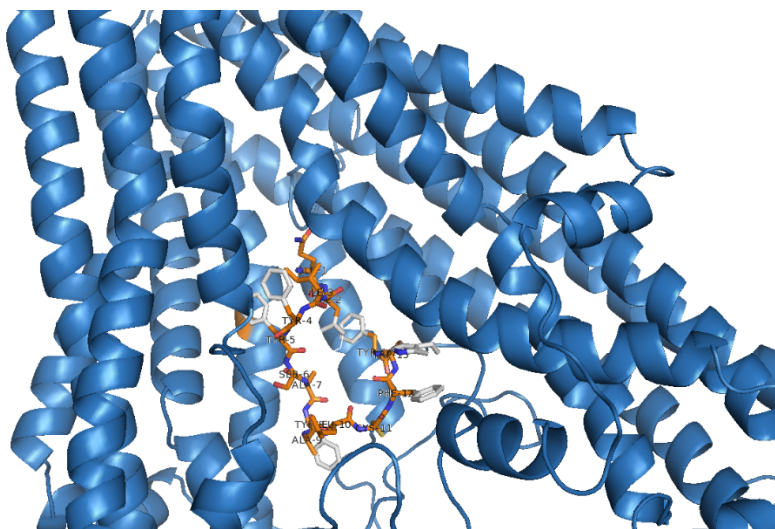

I1

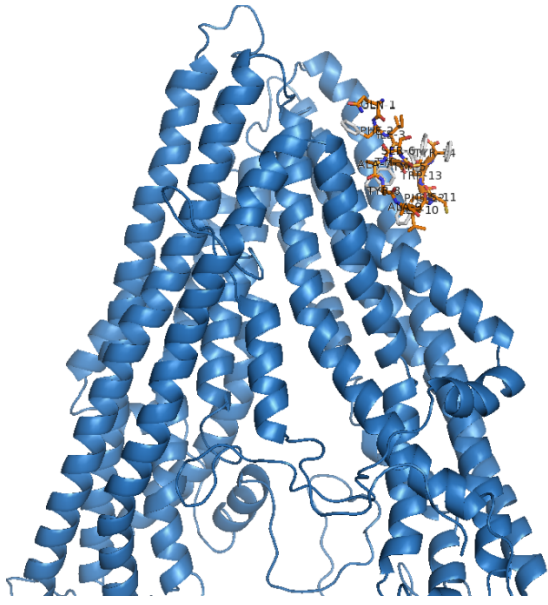

I2

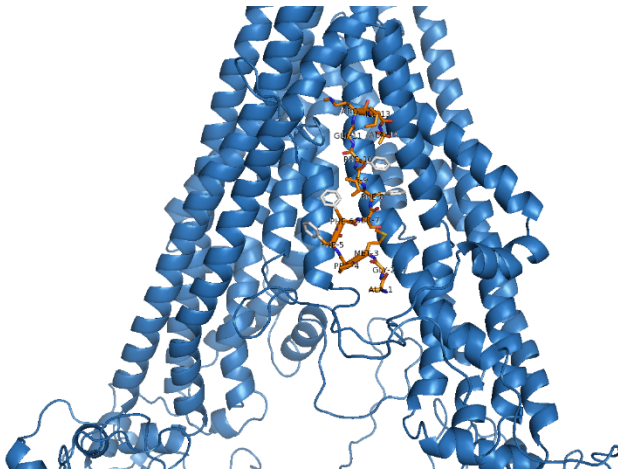

I3

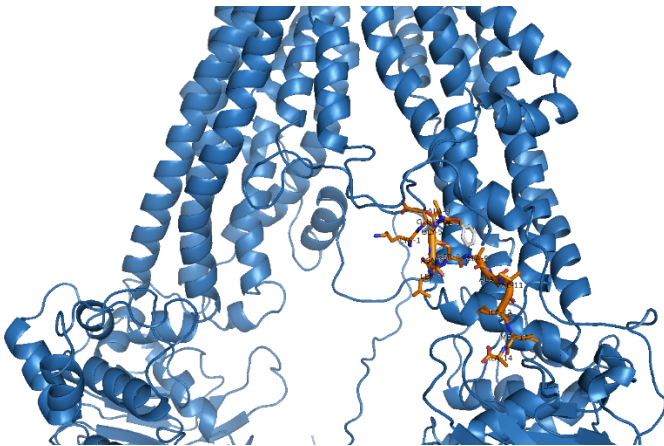

I4

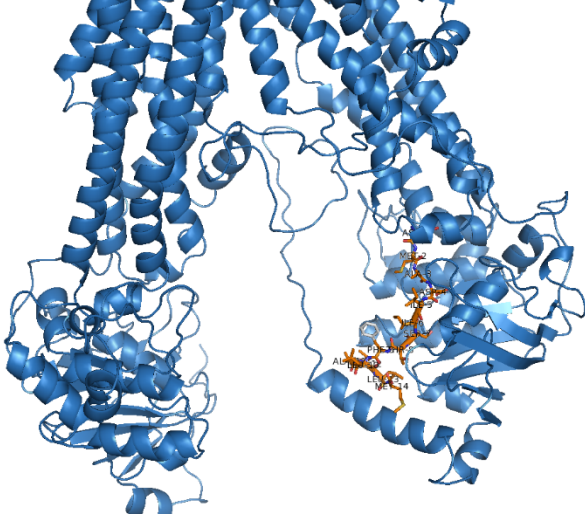

15

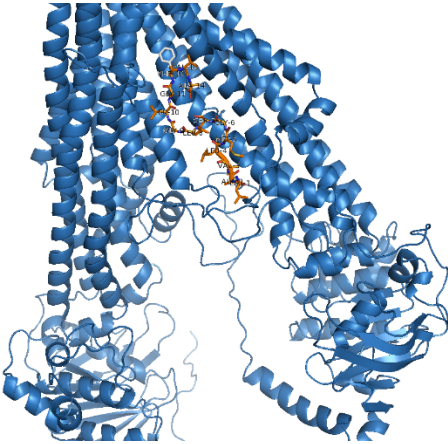

16

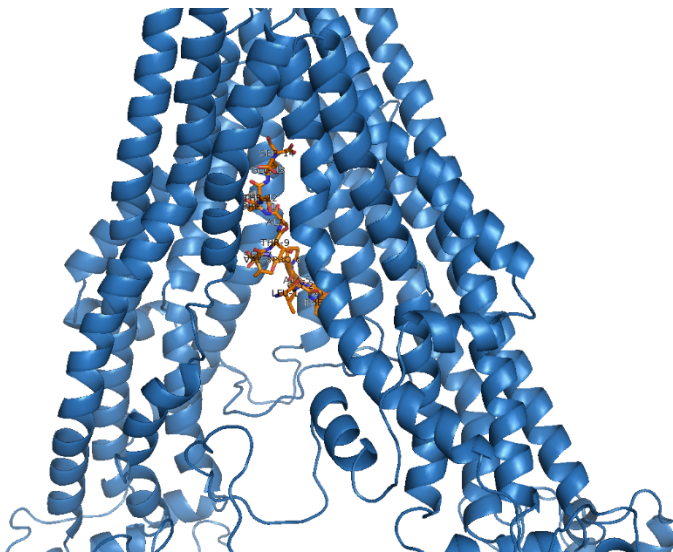

17

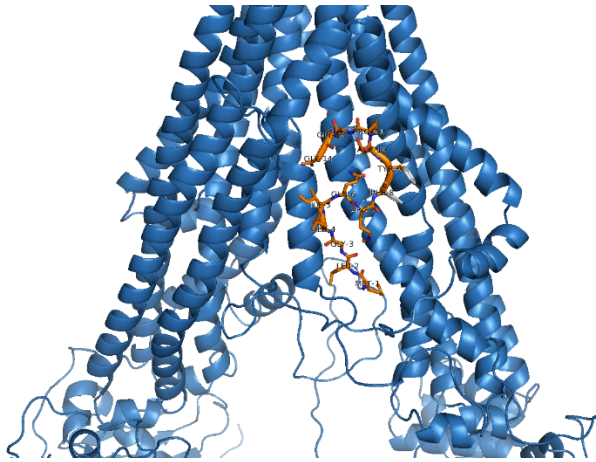

18

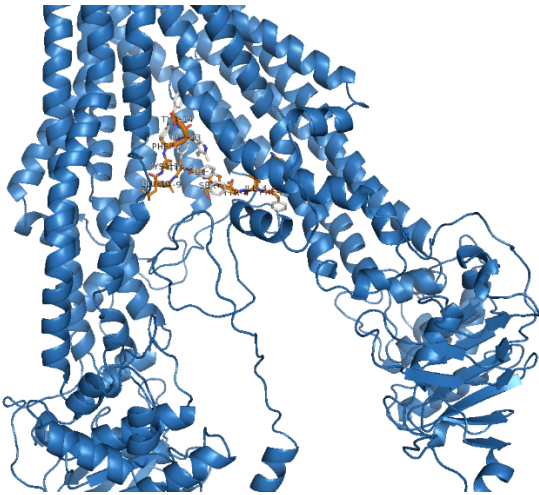

19

Supplement: c4mb00713a4.pdf [file c4mb00713a4.pdf]
